# Supplementary material for: Nationwide incidence and treatment pattern of retinopathy of prematurity in South Korea using the 2007–2018 national health insurance claims data
Source: PubMed Central journal article supplement (PMC7809441; doi:10.1038/s41598-021-80989-z), 2021-01-14
Supplement: 41598_2021_80989_MOESM1_ESM.pdf [file 41598_2021_80989_MOESM1_ESM.pdf]

# **Nationwide incidence and treatment pattern of retinopathy of prematurity in South Korea using the 2007-2018 national health insurance claims data**

**Eun Hee Hong<sup>1,\*</sup>, Yong Un Shin<sup>1,\*</sup>, Gi Hwan Bae<sup>2</sup>, Young Jin Choi<sup>3</sup>, Seong Joon Ahn<sup>1</sup>, Lucia Sobrin<sup>4</sup>, Rimkyung Hong<sup>1</sup>, Inah Kim<sup>2,\*</sup>, Heeyoon Cho<sup>1,\*</sup>**

<sup>1</sup>Department of Ophthalmology, Hanyang University College of Medicine, Seoul, Korea

<sup>2</sup>Department of Occupational and Environment Medicine, Hanyang University College of Medicine, Seoul, Korea

<sup>3</sup>Department of Pediatrics, Hanyang University College of Medicine, Seoul, Korea

<sup>4</sup>Department of Ophthalmology, Massachusetts Eye and Ear Infirmary, Harvard Medical School, Boston, MA, USA

\*Corresponding Authors: Heeyoon Cho, MD, PhD, [hycho@hanyang.ac.kr](mailto:hycho@hanyang.ac.kr)

\*Co-corresponding Author: Inah Kim, MD, MPH, PhD, [inahkim@hanyang.ac.kr](mailto:inahkim@hanyang.ac.kr)

\*These authors (Eun Hee Hong and Yong Un Shin) contributed equally to this work.

**Supplementary Table S1.** Annual number of total newborns and premature infants identified in this study during the study period (2007 through 2018).

|                | <b>Total</b>          |                                           | <b>Male</b>           |                                           | <b>Female</b>         |                                           |
|----------------|-----------------------|-------------------------------------------|-----------------------|-------------------------------------------|-----------------------|-------------------------------------------|
|                | <b>Total newborns</b> | <b>Premature infants (GA &lt; 37 wks)</b> | <b>Total newborns</b> | <b>Premature infants (GA &lt; 37 wks)</b> | <b>Total newborns</b> | <b>Premature infants (GA &lt; 37 wks)</b> |
| <b>Year</b>    |                       |                                           |                       |                                           |                       |                                           |
| <b>2007</b>    | 496,822               | 8,366                                     | 255,872               | 4,520                                     | 240,950               | 3,846                                     |
| <b>2008</b>    | 465,892               | 9,890                                     | 240,119               | 5,456                                     | 225,773               | 4,434                                     |
| <b>2009</b>    | 444,849               | 9,667                                     | 229,351               | 5,167                                     | 215,498               | 4,500                                     |
| <b>2010</b>    | 470,171               | 10,926                                    | 242,901               | 5,901                                     | 227,270               | 5,025                                     |
| <b>2011</b>    | 471,265               | 11,330                                    | 242,121               | 6,240                                     | 229,144               | 5,090                                     |
| <b>2012</b>    | 484,550               | 12,451                                    | 248,958               | 6,770                                     | 235,592               | 5,681                                     |
| <b>2013</b>    | 436,455               | 12,414                                    | 223,883               | 6,830                                     | 212,572               | 5,584                                     |
| <b>2014</b>    | 435,435               | 12,790                                    | 223,356               | 6,949                                     | 212,079               | 5,841                                     |
| <b>2015</b>    | 438,420               | 14,449                                    | 224,906               | 7,917                                     | 213,514               | 6,532                                     |
| <b>2016</b>    | 406,243               | 14,139                                    | 208,064               | 7,715                                     | 198,179               | 6,424                                     |
| <b>2017</b>    | 357,771               | 13,003                                    | 184,308               | 7,141                                     | 173,463               | 5,862                                     |
| <b>2018</b>    | 326,822               | 12,539                                    | 167,686               | 6,927                                     | 159,136               | 5,612                                     |
| <b>Overall</b> | 5,234,695             | 141,964                                   | 2,691,525             | 77,533                                    | 2,543,170             | 64,431                                    |

GA, Gestational age

**Supplementary Table S2.** The annual percentage of ROP infants who underwent treatment according to the treatment type and the GA groups.

| Year           | Overall (GA < 37wks) |                            |                              |                              | GA < 28wks |                            |                              |                              | 28wks ≤ GA < 37wks |                            |                             |                             |
|----------------|----------------------|----------------------------|------------------------------|------------------------------|------------|----------------------------|------------------------------|------------------------------|--------------------|----------------------------|-----------------------------|-----------------------------|
|                | ROP<br>(n)           | Surgery<br>(n, %)          | Retinal ablation<br>(n, %)   | Total<br>(n, %)              | ROP<br>(n) | Surgery<br>(n, %)          | Retinal ablation<br>(n, %)   | Total<br>(n, %)              | ROP<br>(n)         | Surgery<br>(n, %)          | Retinal ablation<br>(n, %)  | Total<br>(n, %)             |
| <b>2007</b>    | 3308                 | 14<br>(0.4%)               | 149<br>(4.5%)                | 154<br>(4.7%)                | 141        | 5<br>(3.6%)                | 40<br>(28.4%)                | 43<br>(30.5%)                | 3167               | 9<br>(0.3%)                | 109<br>(3.4%)               | 111<br>(3.5%)               |
| <b>2008</b>    | 3687                 | 14<br>(0.4%)               | 115<br>(3.1%)                | 122<br>(3.3%)                | 143        | 2<br>(1.4%)                | 32<br>(22.4%)                | 32<br>(22.4%)                | 3544               | 12<br>(0.3%)               | 83<br>(2.3%)                | 90<br>(2.5%)                |
| <b>2009</b>    | 3579                 | 6<br>(0.2%)                | 113<br>(3.2%)                | 115<br>(3.2%)                | 142        | 1<br>(0.7%)                | 29<br>(20.4%)                | 30<br>(21.1%)                | 3437               | 5<br>(0.2%)                | 84<br>(2.4%)                | 85<br>(2.5%)                |
| <b>2010</b>    | 3656                 | 7<br>(0.2%)                | 104<br>(2.8%)                | 105<br>(2.9%)                | 97         | 0<br>(0.0%)                | 27<br>(27.8%)                | 27<br>(27.8%)                | 3559               | 7<br>(0.2%)                | 77<br>(2.2%)                | 78<br>(2.2%)                |
| <b>2011</b>    | 3702                 | 13<br>(0.4%)               | 126<br>(3.4%)                | 132<br>(3.6%)                | 200        | 9<br>(4.5%)                | 59<br>(29.5%)                | 64<br>(32.0%)                | 3502               | 4<br>(0.1%)                | 67<br>(1.9%)                | 68<br>(1.9%)                |
| <b>2012</b>    | 3794                 | 6<br>(0.2%)                | 121<br>(3.2%)                | 124<br>(3.3%)                | 283        | 4<br>(1.4%)                | 57<br>(20.1%)                | 58<br>(20.5%)                | 3511               | 2<br>(0.1%)                | 64<br>(1.9%)                | 66<br>(1.9%)                |
| <b>2013</b>    | 3673                 | 3<br>(0.1%)                | 97<br>(2.6%)                 | 98<br>(2.7%)                 | 229        | 0<br>(0.0%)                | 53<br>(23.1%)                | 53<br>(23.1%)                | 3444               | 3<br>(0.1%)                | 44<br>(1.3%)                | 45<br>(1.3%)                |
| <b>2014</b>    | 3623                 | 8<br>(0.2%)                | 98<br>(2.7%)                 | 99<br>(2.7%)                 | 216        | 5<br>(2.3%)                | 65<br>(30.1%)                | 65<br>(30.1%)                | 3407               | 3<br>(0.1%)                | 33<br>(1.0%)                | 34<br>(1.0%)                |
| <b>2015</b>    | 3635                 | 4<br>(0.1%)                | 96<br>(2.6%)                 | 99<br>(2.7%)                 | 247        | 1<br>(0.4%)                | 64<br>(25.9%)                | 64<br>(25.9%)                | 3388               | 3<br>(0.1%)                | 32<br>(0.9%)                | 35<br>(1.0%)                |
| <b>2016</b>    | 3546                 | 0<br>(0.0%)                | 72<br>(2.0%)                 | 72<br>(2.0%)                 | 207        | 0<br>(0.0%)                | 43<br>(20.8%)                | 43<br>(20.8%)                | 3339               | 0<br>(0.0%)                | 29<br>(0.9%)                | 29<br>(0.9%)                |
| <b>2017</b>    | 3154                 | 5<br>(0.2%)                | 70<br>(2.2%)                 | 73<br>(2.3%)                 | 184        | 2<br>(1.1%)                | 47<br>(25.5%)                | 48<br>(26.1%)                | 2970               | 3<br>(0.1%)                | 23<br>(0.8%)                | 25<br>(0.8%)                |
| <b>2018</b>    | 2943                 | 4<br>(0.1%)                | 53<br>(1.8%)                 | 53<br>(1.8%)                 | 151        | 2<br>(1.3%)                | 34<br>(22.5%)                | 34<br>(22.5%)                | 2792               | 2<br>(0.1%)                | 19<br>(0.7%)                | 19<br>(0.7%)                |
| <b>Overall</b> | 42300                | <b>84</b><br><b>(0.2%)</b> | <b>1214</b><br><b>(2.9%)</b> | <b>1246</b><br><b>(3.0%)</b> | 2240       | <b>31</b><br><b>(1.4%)</b> | <b>550</b><br><b>(24.6%)</b> | <b>561</b><br><b>(25.0%)</b> | 40060              | <b>53</b><br><b>(0.1%)</b> | <b>664</b><br><b>(1.7%)</b> | <b>685</b><br><b>(1.7%)</b> |

GA, Gestational age; ROP, retinopathy of prematurity
